# Supplementary material for: Interferon-gamma release assay for the diagnosis of latent tuberculosis infection: A latent-class analysis
Source: PubMed Central journal article supplement (PMC5705142; doi:10.1371/journal.pone.0188631), 2017-11-28
Supplement: pone.0188631.s001.pdf [file pone.0188631.s001.pdf]

## **PubMed search strategy**

Search algorithm:

(tuberculin[mesh]) OR "TST" OR "Mantoux") and ("interferon gamma release assay" OR "interferon gamma assay" OR "QuantiFero\*" OR "IGRA" OR "T-SPO\*" OR "TSPO\*" OR "Elispot" OR CFP10 OR ESAT6) and (tuberculosis[mesh]).

Restrictions: Humans
