# Supplementary material for: Interferon-gamma release assay for the diagnosis of latent tuberculosis infection: A latent-class analysis
Source: PubMed Central journal article supplement (PMC5705142; doi:10.1371/journal.pone.0188631), 2017-11-28
Supplement: pone.0188631.s003.pdf [file pone.0188631.s003.pdf]

## Formulae for positive predictive value (PPV) and negative predictive value

### (NPV)

$$\begin{aligned} PPV = P(D + | T +) &= \frac{P(T + | D +)P(D+)}{P(T+)} = \frac{P(T + | D +)P(D+)}{P(T + | D +)P(D +) + P(T + | D -)P(D-)} \\ &= \frac{S\pi}{S\pi + (1 - C)(1 - \pi)}; \end{aligned}$$

$$\begin{aligned} NPV = P(D - | T -) &= \frac{P(T - | D -)P(D-)}{P(T-)} = \frac{P(T - | D -)P(D-)}{P(T - | D +)P(D +) + P(T - | D -)P(D-)} \\ &= \frac{C(1 - \pi)}{(1 - S)\pi + C(1 - \pi)}. \end{aligned}$$

where  $D$  is disease status;  $T$  is diagnostic test results;  $\pi$  is prevalence of the disease in the population;  $S$  is sensitivity of the diagnostic test being considered; and  $C$  is specificity of the diagnostic test being considered.
