# Supplementary material for: Interferon-gamma release assay for the diagnosis of latent tuberculosis infection: A latent-class analysis
Source: PubMed Central journal article supplement (PMC5705142; doi:10.1371/journal.pone.0188631), 2017-11-28
Supplement: pone.0188631.s005.pdf [file pone.0188631.s005.pdf]

**S2 Table. Sensitivity of results to exclusion of studies deemed to be of high risk of bias.**

| Parameter       | Diagnostic test   | Base case median (95% CrI)* | Exclusion of studies of high risk of bias median (95% CrI)* |
|-----------------|-------------------|-----------------------------|-------------------------------------------------------------|
| Sensitivity (%) | QFT-GIT           | 52 (50 - 53)                | 53 (51 - 54)                                                |
|                 | TST               | 84 (82 - 85)                | 83 (82 - 85)                                                |
| Specificity (%) | QFT-GIT (non-BCG) | 97 (96 - 97)                | 97 (96 - 98)                                                |
|                 | QFT-GIT (BCG)     | 93 (92 - 94)                | 93 (92 - 94)                                                |
|                 | TST (non-BCG)     | 100 (99 - 100)              | 100 (99 - 100)                                              |
|                 | TST (BCG)         | 79 (76 - 82)                | 76 (74 - 79)                                                |

\*Results are for immune-competent adults.

BCG, Bacillus Calmette-Guérin; CrI, credible interval; QFT-GIT, QuantiFERON-TB Gold In Tube; TB, tuberculosis; TST, tuberculin skin test.
