# Supplementary material for: Interferon-gamma release assay for the diagnosis of latent tuberculosis infection: A latent-class analysis
Source: PubMed Central journal article supplement (PMC5705142; doi:10.1371/journal.pone.0188631), 2017-11-28
Supplement: pone.0188631.s006.pdf [file pone.0188631.s006.pdf]

**S3 Table. Sensitivity of results to prior distributions.**

| Parameter                         | Prior distribution            | Model estimates* median (95% CrI) | Prior distribution | Model estimates* median (95% CrI) | Prior distribution | Model estimates* median (95% CrI) |
|-----------------------------------|-------------------------------|-----------------------------------|--------------------|-----------------------------------|--------------------|-----------------------------------|
| Sensitivity QFT-GIT (%)           | Beta(15,5.3)<br>(base case)   | 52 (50 - 53)                      | Uniform(0.55,0.93) | 55 (55 - 55)                      | Uniform(0.5,1)     | 52 (50 - 53)                      |
| Sensitivity TST (%)               | Beta(14.6,4.6)<br>(base case) | 84 (82 - 85)                      | Uniform(0.57,0.95) | 83 (82 - 84)                      | Uniform(0.5,1)     | 84 (82 - 85)                      |
| Specificity QFT-GIT (non-BCG) (%) | Beta(64,3.7)<br>(base case)   | 97 (96 - 97)                      | Uniform(0.89,1)    | 97 (96 - 98)                      | Uniform(0.5,1)     | 97 (96 - 97)                      |
| Specificity QFT-GIT (BCG) (%)     | Beta(64,3.7)<br>(base case)   | 93 (92 - 94)                      | Uniform(0.89,1)    | 93 (92 - 95)                      | Uniform(0.5,1)     | 93 (92 - 94)                      |
| Specificity TST (non-BCG) (%)     | Beta(9.9,2.9)<br>(base case)  | 100 (99 - 100)                    | Uniform(0.55,1)    | 100 (100 - 100)                   | Uniform(0.5,1)     | 100 (99 - 100)                    |
| Specificity TST (BCG) (%)         | Beta(9.9,2.9)<br>(base case)  | 79 (76 - 82)                      | Uniform(0.55,1)    | 73 (71 - 75)                      | Uniform(0.5,1)     | 79 (76 - 82)                      |

\*Results are for immune-competent adults.

BCG, Bacillus Calmette-Guérin; CrI, credible interval; QFT-GIT, QuantiFERON-TB Gold In Tube; TB, tuberculosis; TST, tuberculin skin test.
